1 Novel insights into the pig gut microbiome using metagenome-assembled genomes

2 Devin B. Holman<sup>a#</sup>, Arun Kommadath<sup>a</sup>, Jeffrey P. Tingley<sup>bc</sup>, D. Wade Abbott<sup>bc</sup>

3

4 <sup>a</sup>Lacombe Research and Development Centre, Agriculture and Agri-Food Canada, 6000 C&E  
5 Trail, Lacombe, AB, T4L1W1, Canada

6 <sup>b</sup>Lethbridge Research and Development Centre, Agriculture and Agri-Food Canada, 5403 1<sup>st</sup>  
7 Avenue South, Lethbridge, AB, T1J 4B1, Canada

8 <sup>c</sup>Department of Biochemistry, University of Lethbridge, Lethbridge, AB T1K 6T5, Canada

9

10 #Address correspondence to Devin B. Holman, [devin.holman@agr.gc.ca](mailto:devin.holman@agr.gc.ca)

11

12

13

14

15

16 **Running title:** Swine gut-derived metagenome-assembled genomes

17

18

19

20

21 Keywords: metagenome-assembled genomes, antimicrobial resistance, CAZymes, swine, gut  
22 microbiome

23

## 24 **Abstract**

25 Pigs are among the most numerous and intensively farmed food-producing animals in the world.  
26 The gut microbiome plays an important role in the health and performance of swine and changes  
27 rapidly after weaning. Here, fecal samples were collected from pigs at 7 different times points  
28 from 7 to 140 days of age. These swine fecal metagenomes were used to assemble 1,150  
29 dereplicated metagenome-assembled genomes (MAGs) that were at least 90% complete and had  
30 less than 5% contamination. These MAGs represented 472 archaeal and bacterial species, and  
31 the most widely distributed MAGs were the uncultured species *Collinsella* sp002391315,  
32 *Sodaliphilus* sp004557565, and *Prevotella* sp000434975. Weaning was associated with a  
33 decrease in the relative abundance of 69 MAGs (e.g. *Escherichia coli*) and an increase in the  
34 relative abundance of 140 MAGs (e.g. *Clostridium* sp000435835, *Oliverpabstia intestinalis*).  
35 Genes encoding for the production of the short-chain fatty acids acetate, butyrate, and propionate  
36 were identified in 68.5%, 18.8%, and 8.3% of the MAGs, respectively. Carbohydrate-active  
37 enzymes associated with the degradation of arabinose oligosaccharides and mixed-linkage  
38 glucans were predicted to be most prevalent among the MAGs. Antimicrobial resistance genes  
39 were detected in 327 MAGs, including 59 MAGs with tetracycline resistance genes commonly  
40 associated with pigs such as *tet(44)*, *tet(Q)*, and *tet(W)*. Overall, 82% of the MAGs were  
41 assigned to species that lack cultured representatives indicating that a large portion of the swine  
42 gut microbiome is still poorly characterized. The results here also demonstrate the value of  
43 MAGs in adding genomic context to gut microbiomes.

## 44 **Importance**

45 Many of the bacterial strains found in the mammalian gut are difficult to culture and isolate due  
46 to their various growth and nutrient requirements that are frequently unknown. Here, we

47 assembled strain-level genomes from short metagenomic sequences, so-called metagenome-  
48 assembled genomes (MAGs), that were derived from fecal samples collected from pigs at  
49 multiple time points. The majority of these MAGs represented bacterial species that have yet to  
50 be cultured or described thus underlining the need for cultivation studies that isolate and describe  
51 novel bacterial species. The genomic context of a number of antimicrobial resistance genes  
52 commonly detected in swine was also determined. In addition, our study connected taxonomy  
53 with potential metabolic functions such as carbohydrate degradation and short-chain fatty acid  
54 production.

## 55 **Introduction**

56 Pork production continues to increase globally (1) despite serious challenges, such as  
57 antimicrobial use and resistance (2) and infectious disease (3), that threaten its profitability and  
58 sustainability. Microbiome research has the potential to contribute solutions to some of these  
59 issues, given a better understanding of the swine gut microbiome. The pig gut microbiome, as in  
60 most mammals, provides the host with numerous benefits including protection against pathogen  
61 colonization, aiding immune system development and maturation, and production of certain  
62 vitamins and metabolites (4). The number of unique genes within the gut microbiome also  
63 greatly exceeds those encoded within the pig genome thereby providing the host with an  
64 expanded repertoire of genes that can degrade dietary substrates (5).

65 Cultivation of many of the microbes found in the swine gastrointestinal tract remains  
66 difficult due to their unique, and often unknown, growth requirements. Consequently this has  
67 traditionally limited study of the mammalian gut microbiome to those microbes that can be easily  
68 grown and characterized in the laboratory (6). However, this often represents only a small  
69 fraction of the microbial diversity in the gut. In recent years, metagenome-assembled genomes  
70 (MAGs) recovered from shotgun metagenomic sequences have greatly expanded the number of

71 microbial genomes in reference databases (7-10). Although the quality of these MAGs varies,  
72 they enable researchers to connect functional potential with microbial species and strains lacking  
73 cultured representatives.

74 Previously, we assessed the effects of varying weaning ages on the development of the  
75 swine gut microbiome using shotgun metagenomic sequences generated from fecal samples  
76 collected from pigs throughout the swine production cycle (11). Here, we assembled those  
77 sequences and binned the assembled contigs into MAGs, retaining only those MAGs that were at  
78 least 90% complete and had less than 5% contamination. Our main objective was to characterize  
79 the functional potential represented by those MAGs, including carbohydrate-active enzymes  
80 (CAZymes) and antimicrobial resistance genes (ARGs) and to associate those functions with  
81 individual taxa. In addition, we aimed to determine if MAGs assembled in this study are  
82 representative of the pig gut microbiome in general by using metagenomic sequences from other  
83 publicly-available swine studies.

## 84 **Results**

### 85 **Metagenome-assembled genomes**

86 From 738 Gb of shotgun metagenomic sequencing data, 87,472 MAGs with greater than  
87 90% completeness and less than 5% contamination were recovered. After dereplication at 99%  
88 ANI (average nucleotide identity), the remaining 1,150 non-redundant MAGs represented  
89 potentially unique strains that were assigned to 360 and 472 archaeal and bacterial genera and  
90 species, respectively (Supplementary Table S1). The MAGs ranged in size from 0.74 to 6.14 Mb  
91 with an average size of 2.28 Mb (SEM  $\pm$  0.02). The 358 MAGs that were not assigned to a  
92 species in the Genome Database Taxonomy (GTDB) at a 95% ANI threshold may represent  
93 potentially novel species, 32 of which also had no genus designation. When 95% ANI was used

94 for secondary clustering, 758 dereplicated MAGs (putative species) were produced from the  
95 original 87,472 MAGs. The vast majority of the MAGs classified using GTDB were bacteria and  
96 only 10 MAGs were assigned to the archaea, all of which were identified as methanogens. In  
97 total, 19 unique phyla were represented among the MAGs (Fig. 1). The most common species  
98 designation was *Collinsella* sp002391315 (22 MAGs), followed by *Sodaliphilus* sp004557565  
99 (19 MAGs), *Prevotella* sp000434975 (17 MAGs), and UBA3388 sp004551865 (13 MAGs).  
100 Overall, 938 MAGs were assigned to archaeal or bacterial species that lack cultured  
101 representatives.

## 102 **Functional analysis of MAGs**

103 Functional profiling of the dereplicated MAGs using CAZymes and Kyoto Encyclopedia  
104 of Genes and Genomes (KEGG) pathways was carried out using the Distilled and Refined  
105 Annotation of Metabolism (DRAM) package. There were 6,656 unique KOs (KEGG Orthology)  
106 and 155,297 CAZymes within 281 unique CAZyme families identified among the MAGs. The  
107 average number of CAZymes per MAG was  $135.0 \pm 2.9$  within  $33.3 \pm 0.5$  CAZyme families  
108 (Supplementary Table S2). The glycoside hydrolases (GHs;  $n = 122$ ) were most prevalent among  
109 the unique CAZyme families followed by carbohydrate-binding modules (CBMs;  $n = 58$ ),  
110 glycosyltransferases (GTs;  $n = 55$ ), polysaccharide lyases (PLs;  $n = 24$ ), carbohydrate esterases  
111 (CEs;  $n = 14$ ), and auxiliary activities (AAs;  $n = 8$ ). The GH families GH2, GH3, GH13, GH23,  
112 GH25, GH31, GH32, GH36, GH73, and GH77 were most widely distributed. Many of the  
113 MAGs encoding the greatest number of CAZymes and CAZyme families belonged to the  
114 *Bacteroidaceae* family including *Bacteroides fragilis*, *Bacteroides heparinolyticus*, *Bacteroides*  
115 *stercoris*, *Bacteroides thetaiotaomicron*, *Bacteroides uniformis*, *Bacteroides xylanisolvens*, and  
116 *Phocaeicola vulgatus*. CAZymes involved in the degradation of arabinose oligosaccharides and

117 mixed-linkage glucans were found in at least 50% of the MAGs and CAZymes predicted to be  
118 involved in the digestion of amorphous cellulose, arabinan, beta-mannan, fucose  
119 oligosaccharides, pectin, rhamnose oligosaccharides, starch, xylan, and xyloglucan were encoded  
120 by 25% or more of the MAGs (Supplementary Table S3). Mucin-degrading CAZymes were  
121 identified in only 26 MAGs, with four of these classified as *Pauljensenia hyovaginalis* and  
122 another three as *Tractidigestivibacter* sp004557505.

123 The production of SCFAs from carbohydrates is an important function of the gut  
124 microbiome from the perspective of the host. The most significant of these are acetate, butyrate,  
125 and propionate. Here, 68.5% of the MAGs encoded acetate-producing enzymes (acetate kinase  
126 [K00925] and phosphate acetyltransferase enzymes [K00625 or K13788]) and 8.3% had the  
127 propionate CoA-transferase gene (K01026) (Supplementary Table S3). Genes for butyrate  
128 production via the butyryl-CoA:acetate CoA-transferase (K01034, K01035) or butyrate kinase  
129 (K00634, K00929) pathways were identified in 18.8% of MAGs and included known butyrate  
130 producers, such as *Anaerostipes hadrus*, *Butyricimonas virosa*, *Butyrivibrio crossotus*,  
131 *Cloacibacillus porcorum*, *Coprococcus catus*, *Gemmiger formicilis*, *Faecalibacterium*  
132 *prausnitzii*, *Flavonifractor plautii*, and *Megasphaera elsdenii*.

133 Succinate is a propionate precursor that is produced by certain bacteria species. Genes  
134 encoding a fumarate reductase/succinate hydrogenase (K00239, K00240, K00241 and K00244,  
135 K00245, K00246) were identified in 28.9% of the MAGs. Known succinate producers among the  
136 MAGs with these genes included *Akkermansia muciniphila*, *Anaerobiospirillum*  
137 *succiniciproducens*, *Mitsuokella jalaludinii*, *Parabacteroides distasonis*, and *P. vulgatus*. The  
138 potential for either D-lactate or L-lactate production via lactate dehydrogenase (K00016, K03778)  
139 was detected in 55.3% of the MAGs. Genes for the production of both enantiomers of lactate

140 were carried by 172 MAGs and over half (n = 92) of these were members of the *Treponema*  
141 genus or *Lachnospiraceae* or *Lactobacillaceae* families.

142 The 10 archaeal MAGs all carried the genes encoding the methyl-coenzyme M reductase  
143 complex (K00399, K00400, K00401, K00402, K03421, K03422) involved in methanogenesis  
144 (Supplementary Table S3). However, only the *Methanobacteriaceae* MAGs had the genes for the  
145 formylmethanofuran dehydrogenase complex (K00200, K00201, K00202, K00203, K00204,  
146 K00205, K11260, K11261) that is necessary for the reduction of carbon dioxide to methane.  
147 Hydrogen sulfide production in swine manure slurry has been linked to *Desulfovibrio* spp. (12)  
148 and here genes encoding the dissimilatory sulfite reductase and involved in the metabolism of  
149 sulfate were only identified in the eight *Desulfovibrionaceae* MAGs. This included *Desulfovibrio*  
150 *piger* and *Desulfovibrio* sp900556755 as well as one MAG classified as *Bilophila wadsworthia*.  
151 These *Desulfovibrionaceae* MAGs also carried the gene for thiosulfate reductase (K08352)  
152 which produces sulfide and sulfite through the reduction of thiosulfate.

### 153 **Antimicrobial resistance genes**

154 The 1,150 dereplicated MAGs were screened for ARGs using the comprehensive  
155 antibiotic resistance database (CARD). A total of 327 MAGs carried at least one ARG  
156 (Supplementary Table S4), and together they accounted for 115 unique ARGs, excluding those  
157 due to point mutations. The six *Escherichia coli* MAGs contained the greatest number of ARGs  
158 (52 to 60) by a large margin. However, this is expected given that the vast majority of these  
159 ARGs are widespread within this species. ARGs conferring resistance to tetracycline (*tet* genes)  
160 are frequently among the most abundant in the gastrointestinal tract of conventionally-raised pigs  
161 and here, 59 MAGs carried at least one *tet* gene. Among the MAGs with at least one *tet* gene and  
162 an overall relative abundance of at least 0.1%, were those identified as *B. fragilis* [*tet*(Q)], *B.*

163 *stercoris* [*tet(Q)*], CAG-873 sp001701165 [*tet(Q)*], *Campylobacter coli* [2 MAGs; *tet(W/N/W)*,  
164 *tet(O)*], *Limosilactobacillus reuteri* [*tet(B)*], *P. vulgatus* [*tet(Q)*], *Prevotella* sp000434975  
165 [*tet(Q)*], *Prevotella* sp000436915 [*tet(37)*], and *Streptococcus pasteurianus* [*tet(M)*].

166 Resistance to macrolide-lincosamide-streptogramin B (MLS<sub>B</sub>) antimicrobials is also often  
167 detected in the swine gut microbiome and 48 MAGs were carried at least one MLS<sub>B</sub> resistance  
168 gene. Relatively abundant ( $\geq 0.1\%$ ) MAGs carrying one or more MLS<sub>B</sub> resistance genes included  
169 *B. fragilis* [*mef(En2)*], *Catenibacterium mitsuokai* [*erm(G)*], *Clostridium* sp000435835 [*erm(Q)*],  
170 *Fusobacterium mortiferum* [*lnu(C)*], *Lactobacillus johnsonii* [2 MAGs; *erm(B)*, *erm(G)*], *L.*  
171 *reuteri* [*erm(B)*], *Parabacteroides merdae* [*mef(En2)*], *P. vulgatus* [*mef(En2)*], *Treponema*  
172 *succinifaciens* [*erm(F)*], *Schaedlerella* sp004556565 [*lnu(C)*], SFDP01 sp004558185 [*erm(B)*],  
173 and *S. pasteurianus* [*lnu(A)*, *lnu(C)*, *erm(B)*].

174 The *vanC* cluster genes, (*vanC*, *vanR<sub>C</sub>*, *vanS<sub>C</sub>*, *vanT<sub>C</sub>*, *vanXY<sub>C</sub>*), which confer resistance  
175 to vancomycin were found in one MAG classified as *Enterococcus gallinarum*. In this species  
176 low-level vancomycin resistance is intrinsic due to this gene cluster (13). The beta-lactamase  
177 resistance gene *cfxA2* was identified in 13 MAGs, including six given the taxonomic designation  
178 *Sodaliphilus* sp004557565. Many of the other beta-lactamase genes detected were associated  
179 with only one bacterial species: *bla<sub>OXA-61</sub>* (three *C. coli* MAGs), *bla<sub>TEM-1</sub>* (one *E. coli* MAG),  
180 *cblA-1* (three *Bacteroides uniformis* MAGs), and *cepA* (one *B. fragilis* MAG). Aminoglycoside  
181 resistance genes among the relatively abundant MAGs ( $> 0.1\%$ ) included *aph(3')-IIIa* in three  
182 MAGs (*C. mitsuokai*, *F. mortiferum*, SFDP01 sp004558185), *aac(6')-Im* (*Blautia* spp.), *aad(6)*  
183 (SFDP01 sp004558185), *aadA* (*E. coli*), *ant(6)-Ib* (*L. johnsonii*), *aph(2'')-IIa* (*Blautia* spp.), and  
184 *aph(6)-Id* (*E. coli*).



185 The location of ARGs within the MAGs was also determined to identify those ARGs co-  
186 located on the same contig as other ARGs and/or integrase/transposase sequences  
187 (Supplementary Fig. S2). The *aac(6')-Im* and *aph(2'')-IIa* genes were adjacent to each other in  
188 three MAGs classified as *Blautia* sp018919065, *Ruminococcus gnavus*, and CAG-238 sp. In one  
189 *T. succinifaciens* MAG, *erm(F)* and *tet(X)* were also found on the same contig as were *tet(M)*  
190 and *tet(W/N/W)* and *tet(44)* and *ant(6)-Ib* in a CAG-877 sp. MAG. In several MAGs, *lnu(C)* was  
191 co-located on the same contig as a putative transposase or integrase gene. Other ARGs  
192 potentially associated with transposases included *tet(44)* in two MAGs assigned to *Onthovivens*  
193 sp016302065 and CAG-1000 sp004552445, *tet(M)* in *Erysipelatoclostridium ramosum* and *S.*  
194 *pasteurianus*, and *tet(Q)* in *Onthomorpha* sp004551865 and *Prevotella* sp900548195.

#### 195 **Pre- vs. post-weaning changes**

196 As these MAGs were assembled from fecal samples taken before and after weaning it  
197 was possible to identify MAGs that were differentially abundant in the fecal microbiome of pigs  
198 immediately before weaning and 7 days post-weaning. There were 69 MAGs that were more  
199 relatively abundant in samples taken just prior to weaning, the most differentially abundant of  
200 which were those classified as *Limousia pullorum*, *B. fragilis*, *E. coli*, *P. hyovaginalis* (*Schaalia*  
201 *hyovaginalis* in NCBI), and *P. vulgatus* (Supplementary Table S5). There were also six MAGs  
202 with a relative abundance greater than 0.1% in the fecal microbiomes of nursing piglets that were  
203 not detected in samples from these same pigs 7 d later. These MAGs were classified as *B.*  
204 *thetaitaomicron*, *Bulleidia* sp., *Enterococcus faecalis*, *Mediterraneibacter torques*, *Parvimonas*  
205 sp., and *P. hyovaginalis*. Among the 140 MAGs that were most enriched in the post-weaning  
206 samples were MAGs assigned to *Copromorpha* sp., *Clostridium* sp000435835, *Fusicatenibacter*  
207 *saccharivorans*, *Intestinibacter* sp., *Oliverpabstia intestinalis*, *Phascolarctobacterium*

208 sp004558595, *Prevotella* sp002251295, *Prevotella* sp004556065, and *Ruminococcus*  
209 sp003011855.

## 210 **Presence of MAGs in publicly available datasets**

211 To determine how widely distributed the species/strains represented by the MAGs in the  
212 present study are among pigs from other studies in different geolocations, the presence and  
213 relative abundance of these MAGs within publicly available swine gut metagenomic datasets  
214 was assessed. These metagenomic sequences were from 626 fecal and cecal content samples  
215 within nine studies representing 13 different counties (Supplementary Table S6). On average,  
216  $45.5\% \pm 0.4\%$  SEM of these metagenomic sequences mapped to one of the MAGs from the  
217 present study (Supplementary Table S7). Two MAGs classified as *Lactobacillus amylovorus*  
218 were the most relatively abundant overall. Other relatively abundant MAGs ( $>0.25\%$ ) included  
219 those identified as *B. fragilis*, *C. mitsuokai*, *L. reuteri*, *Phascolarctobacterium succinatutens*,  
220 *Prevotella pectinovora*, *Prevotella* sp002251295, *Prevotella* sp002300055, *Streptococcus*  
221 *alactolyticus*, and VUNA01 sp002299625. Metagenomic sequences from 96 MAGs were  
222 detected in 90% of these publicly available samples. Thirty-three of these MAGs were classified  
223 within the *Oscillospiraceae* family including 12 as co-abundance gene groups (CAGs), and 8  
224 each as *Dysosmobacter* spp. and *Faecousia* spp. An additional 19 MAGs were assigned to  
225 *Sodaliphilus* sp004557565 and 8 as *Cryptobacteroides* spp.

226 The samples from these studies were all collected from post-weaned pigs and therefore  
227 on a non-metric multidimensional scaling (NMDS) plot of the Bray-Curtis dissimilarities the pre-  
228 weaned pig samples from the present study appear separate from the other samples  
229 (Supplementary Fig. S1). Only eight MAGs were not detected in at least one sample among all  
230 of the publicly available metagenomic samples and three of these MAGs (*Clostridium* sp.,

231 *Erysipelotrichaceae* sp., and *Negativicoccaceae* sp.,) were not identified in any of the post-  
232 weaned samples in the present study either. Overall, including the samples from the current  
233 study, there were 71 MAGs that were found in 85% of all samples (Fig. 2).

## 234 **Discussion**

235 Here we assembled and analyzed 1,150 high-quality MAGs, including 358 that could not  
236 be assigned to a species and thus some of these may represent novel species. Clearly, there still  
237 exists a large fraction of the swine gut microbiome that has yet to be cultivated as demonstrated  
238 by the 938 MAGs that were not associated (>95% ANI) with a phenotypically characterized  
239 archaeal or bacterial species. Previously, we reported on changes in the pig gut microbiome in  
240 response to different weaning ages using the unassembled short reads from this study (11). We  
241 were able to recover MAGs from many of the relatively abundant species in our earlier work  
242 including *Anaeromassilibacillus senegalensis* (An172 in GTDB), *B. fragilis*, *E. coli*, *L.*  
243 *johnsonii*, *L. reuteri*, *P. succinatutens*, *P. pectinovora*, and *Subdoligranulum variabile*  
244 (*Gemmiger variabilis* in the GTDB). The exceptions were *Prevotella copri* and *Clostridioides*  
245 *difficile*; however, this may have been due to differences in how taxonomy was assigned to the  
246 unassembled reads vs. the MAGs as several closely related species were identified here.

247 After weaning, pigs are typically fed a diet that is rich in cereal grains such as corn,  
248 barley, and/or wheat which, in addition to high levels of starch, contain other polysaccharides  
249 such as cellulose, hemicellulose (e.g., mannan, mixed-linkage glucan, xylan, and xyloglucan),  
250 and pectin. These polysaccharides escape digestion by the host and are therefore available as  
251 substrates for the gut microbiome (14). As such, the pig gut microbiome carries a large repertoire  
252 of genes encoding enzymes called CAZymes that can breakdown and metabolize these  
253 polysaccharides. The CAZymes are grouped into families based on sequence similarity, although

254 CAZymes within the same family may have different substrate specificities (15). The AAs, CEs,  
255 GHs, and PLs are the CAZyme families involved in the degradation of glycans and typically  
256 multiple CAZymes are required for the digestion of specific glycans.

257 Many of the MAGs encoding the greatest number of CAZymes and with the potential  
258 capacity to degrade multiple types of glycans were classified within the Bacteroidales order  
259 including *Alistipes senegalensis*, *Alistipes shahii*, *B. thetaiotaomicron*, *B. uniformis*, *B.*  
260 *xylanisolvens*, *Parabacteroides* spp., *P. vulgatus*, and *Prevotella* spp. Bacteria within this order  
261 are well documented as having a diverse and rich set of CAZymes which may be organized into  
262 groups of genes termed polysaccharide utilization loci (PUL) (16, 17). These CAZymes and  
263 PULs likely confer an advantage to these bacteria within a highly competitive ecosystem like the  
264 mammalian gastrointestinal tract. The other taxonomic group of MAGs encoding a large number  
265 of CAZymes was the *Lachnospiraceae* family that included *Acetatifactor* sp., *Blautia*  
266 sp001304935, COE1 sp., *Eisenbergiella massiliensis*, *Hungatella* sp005845265, and *Roseburia*  
267 sp. Some members of this family have also been reported to have gene clusters of CAZymes,  
268 regulators, and transporters that are similar to PULs (18).

269 The potential for the degradation of arabinan, amorphous cellulose, arabinose  
270 oligosaccharides, mixed-linkage glucans, xyloglucan, and xylan was relatively widespread  
271 among the MAGs. In pigs, diets supplemented with xylan, mixed-linkage glucans, and resistant  
272 starch have been shown to increase the relative abundance of *Blautia* spp., *Prevotella* spp. and  
273 *Lachnospiraceae* spp. (19-21). Monosaccharides produced through the action of CAZymes can  
274 then be used by the CAZyme-producer or other bacteria in the gut to generate various  
275 metabolites. In particular, the potential for short-chain fatty acid (SCFA) production through the  
276 fermentation of monosaccharides is frequently a focus of many mammalian gut microbiome

277 studies as even in monogastric animals like pigs, up to 25% of daily energy requirements are met  
278 by SCFAs (22). Butyrate is often the SCFA of most interest as it is the primary energy source for  
279 mammalian colonic epithelial cells and can regulate apoptosis, enhance barrier function, and  
280 reduce inflammation in these cells (23, 24).

281 Here, 216 MAGs carried genes for butyrate production through either the butyryl-  
282 CoA:acetate CoA-transferase (*but*) or butyrate kinase (*buk*) pathways. Although several known  
283 butyrate producers are included among these MAGs such as *B. virosa*, *F. prausnitzii* and *M.*  
284 *elsdenii*, certain MAGs were assigned to bacterial species (e.g., *E. coli*, *E. faecalis*) that do not  
285 typically produce butyrate. Instead, these genes are likely involved in other metabolic functions  
286 or two component systems in these species. Typically, the *but* gene is more prevalent than the  
287 *buk* gene among gut bacteria (25); however, here the number of MAGs carrying either of these  
288 genes was nearly the same. There were also 17 MAGs with both *but* and *buk* genes, including *C.*  
289 *porcorum*, *F. plautii*, and *Intestinimonas massiliensis*.

290 Acetate and propionate, the two other physiologically important SCFAs in the  
291 mammalian gut, also have anti-inflammatory effects in addition to providing an energy source  
292 for the host (26). In the swine lower gastrointestinal tract the concentration ratio of  
293 acetate:propionate:butyrate is approximately 65:25:10 (27, 28) and here the number of MAGs (n  
294 = 788) encoding the acetate kinase and phosphate acetyltransferase genes involved in acetate  
295 production outnumbered those carrying genes for producing butyrate (n = 216) and propionate (n  
296 = 95). Bacterial species represented by these MAGs are therefore attractive targets for  
297 microbiome manipulation studies and culturing work to obtain isolates of these species for  
298 further characterization.

299           There were also significant shifts in the relative abundance of a large number of MAGs 7  
300 days post-weaning. As discussed, the diet of the pigs is abruptly changed at weaning from one  
301 that is liquid and milk-based to one that is solid and based on cereal grains. This often results in a  
302 decrease in the relative abundance of *Bacteroides* and *Escherichia* spp. and an increase in the  
303 relative abundance of *Blautia*, *Prevotella*, and *Roseburia* spp. (29-31). Many of the differentially  
304 abundant MAGs pre- and post-weaning were assigned to these genera; however, there were also  
305 several MAGS classified as bacterial species or genera that are not known to be associated with  
306 weaning. These included MAGs enriched in post-weaning pigs that were assigned to uncultured  
307 genera or species and were also identified as potential butyrate producers such as CAG-83 sp.,  
308 *Aphodosoma* sp900769035, *Copromorpha* sp., *Egerieousia* sp004561775, and UMGS1668  
309 sp004556975. Some of these placeholder names represent bacterial taxa that have been  
310 previously reported in swine gut metagenomes and await further characterization (32, 33). One  
311 MAG classified as *E. faecalis* was relatively abundant in the nursing pig samples ( $0.25 \pm 0.07\%$ )  
312 but was not detected in any of the post-weaning fecal samples. *E. faecalis* was previously  
313 identified among the unassembled reads post-weaning so this MAG may represent a strain of *E.*  
314 *faecalis* that is unique to nursing piglets.

315           Binning ARGs into MAGs generated from short reads is extremely challenging as they  
316 are often flanked by repeat sequences and located on mobile genetic elements such as plasmids  
317 which have different properties (e.g., G+C content) than the chromosomal DNA of their host  
318 (34). Therefore, one can assume that ARGs identified in the MAGs here are located on the  
319 bacterial chromosome. This also explains why the number (115 ARGs) and diversity of ARGs  
320 detected in the present study was much lower than in a previous study (250 ARGs) using the  
321 same short reads that were used to assemble the MAGs here (11) as well as in the metagenome

322 co-assembly (897 ARGs; data not shown). Despite the limitations associated with ARG binning  
323 we were able to provide genomic context for 115 ARGs including several that are relatively  
324 abundant in the swine gut such as *erm*(B), *tet*(44), *tet*(Q), and *tet*(W) (35-38).

325 A number of the *tet* (tetracyclines) and *erm* (MLS<sub>B</sub>) genes were linked to bacterial  
326 species or genera that are considered to be commensal members of the pig gut microbiome such  
327 as *Bacteroides* spp., *Clostridium* spp., *L. johnsonii*, *L. reuteri*, *Prevotella* spp., *Roseburia* spp.,  
328 *Ruminococcus bromii*, and *Succinivibrio* spp. (39, 40). This may explain the extensive  
329 background level of resistance to tetracyclines and MLS<sub>B</sub> antimicrobials in swine gut bacteria  
330 even in the absence of exposure to these antimicrobials, as observed here and reported in many  
331 previous studies (37, 41-43). Until relatively recently in North America, antimicrobials were  
332 often administered to all pigs in a herd for non-therapeutic purposes, namely for growth  
333 promotion (44). The gut microbiome is vertically transferred from sow to piglet and so it highly  
334 plausible that this microbiome would have been exposed to antimicrobials at some point in the  
335 past even if the pigs used in this study were not.

336 Several MAGs also carried ARGs conferring resistance to two or more antimicrobials.  
337 Most notable among these were a *C. coli* MAG encoding *bla*<sub>OXA-61</sub>, *tet*(O), and *tet*(W/N/W) and a  
338 *S. pasteurianus* MAG with *erm*(B), *lnu*(A), *lnu*(C), and *tet*(M). Both of these MAGs were also  
339 enriched in fecal samples of pre-weaned piglets. *C. coli* can be a cause of foodborne illness in  
340 humans (45) and carried by healthy pigs while *S. pasteurianus* is an opportunistic pathogen in  
341 humans and has been associated with meningitis in piglets (46). In addition, certain MAGs  
342 contained more than one ARG on the same contig, suggesting that the ARGs are linked. ARGs  
343 linked together in this manner are more likely to be co-selected and maintained within the  
344 bacterium. The aminoglycoside resistance genes *aac*(6')-*Im* and *aph*(2'')-*Iia* (also known as

345 *aph(2'')-Ib*) were adjacent to each other in three MAGs within the Clostridia class. These ARGs  
346 have previously been reported together in *Enterococcus faecium* and *E. coli* strains (47). A  
347 contig with *erm(F)* and *tet(X)* was also binned into a MAG classified as *T. succinifaciens*. These  
348 two ARGs confer resistance to macrolides and tetracyclines, respectively, and were originally  
349 described on a transposon in *B. fragilis*, although the *tet(X)* gene was reported to be inactive in  
350 this species and under anaerobic conditions (48). The *tet(44)* and *ant(6)-Ib* ARGs found here  
351 together on the same contig in a *Clostridium* sp. MAG have also been co-located on a transposon  
352 in *C. difficile* (49) and a pathogenicity island in *Campylobacter fetus* (50).

353         There were also a number of ARGs co-located with putative transposase or integrase  
354 genes. Transposases and integrases are enzymes that can transfer DNA segments, including  
355 ARGs, within and between bacterial genomes (51). Here, the lincosamide resistance genes  
356 *lnu(C)* and *lnu(P)* were co-located with putative transposase genes in eight different MAGs. Both  
357 *lnu(C)* and *lnu(P)* have been previously identified in *Streptococcus agalactiae* (52) and  
358 *Clostridium perfringens* (53), respectively, where they were located on the same genomic region  
359 as transposase genes. The *tet(44)*, *tet(M)*, *tet(Q)*, and *tet(W/N/W)* genes were also detected on  
360 the same contig as putative transposase genes in certain MAGs. If these ARGs are indeed able to  
361 move between bacterial genomes it may also explain their ubiquity in swine gut metagenomes. It  
362 is possible that some of the contigs with ARGs may have been binned incorrectly given the  
363 difficulties in assembly and binning of ARGs discussed above. However, many of the ARGs  
364 were found in MAGs that were closely related to the known species range for the ARG. The use  
365 of long-read sequencing would likely increase the number of ARGs binned as well as improve  
366 the resolution of their genomic context.



367 We also evaluated the presence of the 1,150 MAGs from the present study within 626  
368 swine gut metagenomes that were publicly available. Sequences aligning to 96 MAGs were  
369 identified in 90% or greater of all these samples and included 8 MAGs that were classified as  
370 *Dysosmobacter* spp. and 19 as *Sodaliphilus* sp004557565. *Dysosmobacter* is a new genus most  
371 closely related to *Oscillibacter* (54), thus explaining the absence of previous reports of this genus  
372 in the swine gut microbiome. The type species of this genus, *Dysosmobacter welbionis*, has  
373 recently been shown to partially protect against some of the negative effects of a high-fat diet  
374 when administered to mice (55). Similar to *Dysosmobacter*, *Sodaliphilus* is a newly described  
375 genus whose type species, *Sodaliphilus pleomorphus*, was first isolated from pig feces. Swine-  
376 derived MAGs classified as *Sodaliphilus* sp004557565 have also been recently reported (33).  
377 These results suggest that members of these genera are widespread among pigs and may  
378 represent previously unreported bacterial taxa.

### 379 **Conclusions**

380 We recovered 1,150 high-quality MAGs from fecal metagenomes of pre- and post-  
381 weaned pigs. The MAGs described here demonstrate the vast potential of the pig gut microbiome  
382 to degrade and metabolize various glycans and of certain members to provide beneficial SCFAs  
383 to the host. In addition, the significant number of ARGs found associated with MAGs assigned  
384 to bacterial species that are typically commensals in the gut, may explain why resistance to  
385 macrolides and tetracyclines persists in the absence of antimicrobial selective pressure. The large  
386 majority of the MAGs were assigned to poorly characterized taxa and thus, there still exists a  
387 large fraction of the swine gut microbiome that has yet to be cultured. This included many  
388 bacterial species that appear to be widely disseminated among pigs from different geolocations.

389 Future efforts focused on expanding the number of known bacterial species would greatly  
390 improve on efforts to manipulate the gut microbiome to improve production and health.

## 391 **Materials and Methods**

### 392 **Experimental design**

393 The study design and fecal sampling were previously described in Holman et al. (11). Briefly,  
394 piglets (n = 15) were assigned to be weaned at one of three ages; 14, 21, or 28 days of age. Fecal  
395 swabs were collected from the piglets at d 7, 14, 21, 28, 35, 70, and 140 days of age (n = 179).  
396 DNA was extracted using the QIAamp BiOstic Bacteremia DNA Kit (Qiagen, Mississauga, ON,  
397 Canada) and shotgun metagenomic sequencing carried out on an Illumina NovaSeq 6000  
398 instrument (Illumina Inc., San Diego, CA, USA) with a SP flowcell (2 x 250 bp) as per Holman  
399 et al. 2021 (11).

### 400 **Bioinformatics**

401 Metagenomic sequences were trimmed (quality score < 15 over a sliding window of 4 bp;  
402 minimum length of 50 bp) and sequencing adapters removed using Trimmomatic v. 0.38 (56).  
403 Host sequences were removed by alignment to the *Sus scrofa* genome (Sscrofa11.1) (57) using  
404 Bowtie2 v. 2.4.2-1 (58). MEGAHIT v. 1.29.0 (59) was used to co-assemble and individually  
405 assemble metagenomes. Prior to co-assembly, all metagenomic samples were normalized using  
406 BBNorm in BBTools v. 38.79 (<https://sourceforge.net/projects/bbmap/>). For the co-assembled  
407 metagenome, the metagenomic sequences from each sample were mapped to the co-assembly  
408 using Bowtie2 and for individual assemblies each sample was aligned to its own metagenomic  
409 assembly. These contigs in each sample with a minimum length of 2,000 bp were then binned  
410 using MetaBAT 2 (60) . These bins or MAGs were assessed for quality and completeness using  
411 CheckM v. 1.1.2 (61) and those MAGs that were > 90% complete and had < 5% contamination

412 were retained. This resulted in 2,327 MAGs from the individually assembled metagenomes and  
413 85,145 MAGs from the co-assembled metagenomes. These MAGs were then dereplicated using  
414 dRep v. 3.2.2 (62) with primary clustering at 90% and secondary clustering at 99% ANI. These  
415 1,150 MAGs were then used for all subsequent analyses.

416 Taxonomy was assigned to each MAG using GTDB-tk 2.0.0 (63) and the GTDB release  
417 207. CoverM v. 0.6.1 (<https://github.com/wwood/CoverM>) (parameters: --min-read-aligned-  
418 percent 75% --min-read-percent-identity 95% --min-covered-fraction 0) was used to determine  
419 the relative abundance (coverage) of each MAG within in each metagenomic sample. A  
420 phylogenetic tree of the MAGs was constructed from the alignment of 399 marker genes in  
421 PhyloPhlAn v. 3.0.60 (64) (parameters: min\_num\_markers=100; f = supermatrix\_aa.cfg) and  
422 visualized using iTol v6. (65). DRAM v. 1.2.4 (66) together with the KEGG (release 100,  
423 October 1, 2021) and dbCAN2 (67) databases was used to annotate the MAGs. The MAGs were  
424 also screened for ARGs using the CARD-RGI v. 5.2.0 (68). Proksee v. 1.0.0a1  
425 (<https://proksee.ca>) was used to visualize the location of the ARGs within each MAG as well as  
426 potential integrases and transposases as annotated by Prokka v. 1.14.6 (69) . MaAsLin2 v. 1.8.0  
427 (70) was used to identify MAGs that were differentially abundant immediately before weaning  
428 and 7 days post-weaning. Only those MAGs with a relative abundance greater than 0.05% in  
429 these samples were included in this analysis.

430 Publicly available metagenomic sequences from other swine gut microbiome studies  
431 published since 2016 were downloaded and aligned to the MAGs in the present study with  
432 CoverM to assess their presence in pigs from other studies in different geographic locations. The  
433 unassembled reads as well as the MAGs from the present study are available under BioProject  
434 PRJNA629856.

435 **Acknowledgements**

436 This research was supported by funding from Alberta Agriculture and Forestry grant 2018R009R  
437 and Agriculture and Agri-Food Canada.

438 **References**

- 439 1. FAO. 2021. Food outlook: biannual report on global food markets, November 2021.  
440 <http://www.fao.org/3/cb7491en/cb7491en.pdf>.
- 441 2. Van Boeckel TP, Pires J, Silvester R, Zhao C, Song J, Criscuolo NG, Gilbert M,  
442 Bonhoeffer S, Laxminarayan R. 2019. Global trends in antimicrobial resistance in  
443 animals in low- and middle-income countries. *Science* 365:eaaw1944.  
444 <https://doi.org/10.1126/science.aaw1944>.
- 445 3. VanderWaal K, Deen J. 2018. Global trends in infectious diseases of swine. *Proc Natl*  
446 *Acad Sci U S A* 115:11495-11500. <https://doi.org/10.1073/pnas.1806068115>.
- 447 4. Patil Y, Gooneratne R, Ju XH. 2020. Interactions between host and gut microbiota in  
448 domestic pigs: a review. *Gut Microbes* 11:310-334.  
449 <https://doi.org/10.1080/19490976.2019.1690363>.
- 450 5. Chen C, Zhou Y, Fu H, Xiong X, Fang S, Jiang H, Wu J, Yang H, Gao J, Huang L. 2021.  
451 Expanded catalog of microbial genes and metagenome-assembled genomes from the pig  
452 gut microbiome. *Nat Commun* 12:1106. <https://doi.org/10.1038/s41467-021-21295-0>.
- 453 6. Renwick S, Ganobis CM, Elder RA, Gianetto-Hill C, Higgins G, Robinson AV,  
454 Vancuren SJ, Wilde J, Allen-Vercoe E. 2021. Culturing Human Gut Microbiomes in the  
455 Laboratory. *Annu Rev Microbiol* 75:49-69. [https://doi.org/10.1146/annurev-micro-](https://doi.org/10.1146/annurev-micro-031021-084116)  
456 [031021-084116](https://doi.org/10.1146/annurev-micro-031021-084116).

- 457 7. Stewart RD, Auffret MD, Warr A, Walker AW, Roehe R, Watson M. 2019. Compendium  
458 of 4,941 rumen metagenome-assembled genomes for rumen microbiome biology and  
459 enzyme discovery. *Nat Biotechnol* 37:953-961. [https://doi.org/10.1038/s41587-019-](https://doi.org/10.1038/s41587-019-0202-3)  
460 [0202-3](https://doi.org/10.1038/s41587-019-0202-3).
- 461 8. Xie F, Jin W, Si H, Yuan Y, Tao Y, Liu J, Wang X, Yang C, Li Q, Yan X, Lin L, Jiang  
462 Q, Zhang L, Guo C, Greening C, Heller R, Guan LL, Pope PB, Tan Z, Zhu W, Wang M,  
463 Qiu Q, Li Z, Mao S. 2021. An integrated gene catalog and over 10,000 metagenome-  
464 assembled genomes from the gastrointestinal microbiome of ruminants. *Microbiome*  
465 9:137. <https://doi.org/10.1186/s40168-021-01078-x>.
- 466 9. Glendinning L, Stewart RD, Pallen MJ, Watson KA, Watson M. 2020. Assembly of  
467 hundreds of novel bacterial genomes from the chicken caecum. *Genome Biol* 21:34.  
468 <https://doi.org/10.1186/s13059-020-1947-1>.
- 469 10. Parks DH, Rinke C, Chuvochina M, Chaumeil PA, Woodcroft BJ, Evans PN, Hugenholtz  
470 P, Tyson GW. 2017. Recovery of nearly 8,000 metagenome-assembled genomes  
471 substantially expands the tree of life. *Nat Microbiol* 2:1533-1542.  
472 <https://doi.org/10.1038/s41564-017-0012-7>.
- 473 11. Holman DB, Gzyl KE, Mou KT, Allen HK. 2021. Weaning Age and Its Effect on the  
474 Development of the Swine Gut Microbiome and Resistome. *mSystems* 6:e0068221.  
475 <https://doi.org/10.1128/mSystems.00682-21>.
- 476 12. Karnachuk OV, Rusanov II, Panova IA, Grigoriev MA, Zyusman VS, Latygolets EA,  
477 Kadyrbaev MK, Gruzdev EV, Beletsky AV, Mardanov AV. 2021. Microbial sulfate  
478 reduction by *Desulfovibrio* is an important source of hydrogen sulfide from a large swine  
479 finishing facility. *Sci Rep* 11:1-11. <https://doi.org/10.1038/s41598-021-90256-w>.

- 480 13. Arias CA, Courvalin P, Reynolds PE. 2000. *vanC* cluster of vancomycin-resistant  
481 *Enterococcus gallinarum* BM4174. Antimicrob Agents Chemother 44:1660-6.  
482 <https://doi.org/10.1128/AAC.44.6.1660-1666.2000>.
- 483 14. Navarro D, Abelilla JJ, Stein HH. 2019. Structures and characteristics of carbohydrates in  
484 diets fed to pigs: a review. J Anim Sci Biotechnol 10:39. [https://doi.org/10.1186/s40104-](https://doi.org/10.1186/s40104-019-0345-6)  
485 [019-0345-6](https://doi.org/10.1186/s40104-019-0345-6).
- 486 15. Lombard V, Golaconda Ramulu H, Drula E, Coutinho PM, Henrissat B. 2014. The  
487 carbohydrate-active enzymes database (CAZy) in 2013. Nucleic Acids Res 42:D490-5.  
488 <https://doi.org/10.1093/nar/gkt1178>.
- 489 16. McKee LS, La Rosa SL, Westereng B, Eijsink VG, Pope PB, Larsbrink J. 2021.  
490 Polysaccharide degradation by the Bacteroidetes: mechanisms and nomenclature.  
491 Environ Microbiol Rep 13:559-581. <https://doi.org/10.1111/1758-2229.12980>.
- 492 17. Grondin JM, Tamura K, Dejean G, Abbott DW, Brumer H. 2017. Polysaccharide  
493 Utilization Loci: Fueling Microbial Communities. J Bacteriol 199:e00860-16.  
494 <https://doi.org/10.1128/JB.00860-16>.
- 495 18. Li H, Ma L, Li Z, Yin J, Tan B, Chen J, Jiang Q, Ma X. 2021. Evolution of the Gut  
496 Microbiota and Its Fermentation Characteristics of Ningxiang Pigs at the Young Stage.  
497 Animals (Basel) 11. <https://doi.org/10.3390/ani11030638>.
- 498 19. Umu OC, Frank JA, Fangel JU, Oostindjer M, da Silva CS, Bolhuis EJ, Bosch G, Willats  
499 WG, Pope PB, Diep DB. 2015. Resistant starch diet induces change in the swine  
500 microbiome and a predominance of beneficial bacterial populations. Microbiome 3:16.  
501 <https://doi.org/10.1186/s40168-015-0078-5>.

- 502 20. Wang Z, Bai Y, Pi Y, Gerrits WJJ, de Vries S, Shang L, Tao S, Zhang S, Han D, Zhu Z,  
503 Wang J. 2021. Xylan alleviates dietary fiber deprivation-induced dysbiosis by selectively  
504 promoting *Bifidobacterium pseudocatenulatum* in pigs. *Microbiome* 9:227.  
505 <https://doi.org/10.1186/s40168-021-01175-x>.
- 506 21. Gorham JB, Kang S, Williams BA, Grant LJ, McSweeney CS, Gidley MJ, Mikkelsen D.  
507 2017. Addition of arabinoxylan and mixed linkage glucans in porcine diets affects the  
508 large intestinal bacterial populations. *Eur J Nutr* 56:2193-2206.  
509 <https://doi.org/10.1007/s00394-016-1263-4>.
- 510 22. Iyayi EA, Adeola O. 2015. Quantification of short-chain fatty acids and energy  
511 production from hindgut fermentation in cannulated pigs fed graded levels of wheat bran.  
512 *J Anim Sci* 93:4781-7. <https://doi.org/10.2527/jas.2015-9081>.
- 513 23. Parada Venegas D, De la Fuente MK, Landskron G, González MJ, Quera R, Dijkstra G,  
514 Harmsen HJ, Faber KN, Hermoso MA. 2019. Short chain fatty acids (SCFAs)-mediated  
515 gut epithelial and immune regulation and its relevance for inflammatory bowel diseases.  
516 *Front Immunol* doi:10.3389/fimmu.2019.00277:277.  
517 <https://doi.org/10.3389/fimmu.2019.00277>.
- 518 24. Bach Knudsen KE, Laerke HN, Hedemann MS, Nielsen TS, Ingerslev AK, Gundelund  
519 Nielsen DS, Theil PK, Purup S, Hald S, Schioldan AG, Marco ML, Gregersen S,  
520 Hermansen K. 2018. Impact of Diet-Modulated Butyrate Production on Intestinal Barrier  
521 Function and Inflammation. *Nutrients* 10:1499. <https://doi.org/10.3390/nu10101499>.
- 522 25. Vital M, Howe AC, Tiedje JM. 2014. Revealing the bacterial butyrate synthesis pathways  
523 by analyzing (meta)genomic data. *mBio* 5:e00889. [https://doi.org/10.1128/mBio.00889-](https://doi.org/10.1128/mBio.00889-14)  
524 [14](https://doi.org/10.1128/mBio.00889-14).

- 525 26. Riviere A, Selak M, Lantin D, Leroy F, De Vuyst L. 2016. Bifidobacteria and Butyrate-  
526 Producing Colon Bacteria: Importance and Strategies for Their Stimulation in the Human  
527 Gut. *Front Microbiol* 7:979. <https://doi.org/10.3389/fmicb.2016.00979>.
- 528 27. Den Besten G, Van Eunen K, Groen AK, Venema K, Reijngoud D-J, Bakker BM. 2013.  
529 The role of short-chain fatty acids in the interplay between diet, gut microbiota, and host  
530 energy metabolism. *J Lipid Res* 54:2325-2340. <https://doi.org/10.1194/jlr.R036012>.
- 531 28. Li H, Ma L, Li Z, Yin J, Tan B, Chen J, Jiang Q, Ma X. 2021. Evolution of the Gut  
532 Microbiota and Its Fermentation Characteristics of Ningxiang Pigs at the Young Stage.  
533 *Animals (Basel)* 11:638. <https://doi.org/10.3390/ani11030638>.
- 534 29. Mach N, Berri M, Estelle J, Levenez F, Lemonnier G, Denis C, Leplat JJ, Chevalere C,  
535 Billon Y, Dore J, Rogel-Gaillard C, Lepage P. 2015. Early-life establishment of the swine  
536 gut microbiome and impact on host phenotypes. *Environ Microbiol Rep* 7:554-69.  
537 <https://doi.org/10.1111/1758-2229.12285>.
- 538 30. De Rodas B, Youmans BP, Danzeisen JL, Tran H, Johnson TJ. 2018. Microbiome  
539 profiling of commercial pigs from farrow to finish. *J Anim Sci* 96:1778-1794.  
540 <https://doi.org/10.1093/jas/sky109>.
- 541 31. Wang X, Tsai T, Deng F, Wei X, Chai J, Knapp J, Apple J, Maxwell CV, Lee JA, Li Y,  
542 Zhao J. 2019. Longitudinal investigation of the swine gut microbiome from birth to  
543 market reveals stage and growth performance associated bacteria. *Microbiome* 7:109.  
544 <https://doi.org/10.1186/s40168-019-0721-7>.
- 545 32. Gaio D, DeMaere MZ, Anantanawat K, Chapman TA, Djordjevic SP, Darling AE. 2021.  
546 Post-weaning shifts in microbiome composition and metabolism revealed by over 25 000



- 547 pig gut metagenome-assembled genomes. *Microb Genom* 7.  
548 <https://doi.org/10.1099/mgen.0.000501>.
- 549 33. Crossfield M, Gilroy R, Ravi A, Baker D, La Ragione RM, Pallen MJ. 2022. Archaeal  
550 and Bacterial Metagenome-Assembled Genome Sequences Derived from Pig Feces.  
551 *Microbiol Resour Announc* 11:e0114221. <https://doi.org/10.1128/mra.01142-21>.
- 552 34. Maguire F, Jia B, Gray KL, Lau WYV, Beiko RG, Brinkman FSL. 2020. Metagenome-  
553 assembled genome binning methods with short reads disproportionately fail for plasmids  
554 and genomic Islands. *Microb Genom* 6. <https://doi.org/10.1099/mgen.0.000436>.
- 555 35. Tunsagool P, Mhuantong W, Tangphatsornruang S, Am-In N, Chuanchuen R,  
556 Luangtongkum T, Suriyaphol G. 2021. Metagenomics of antimicrobial and heavy metal  
557 resistance in the cecal microbiome of fattening pigs raised without antibiotics. *Appl*  
558 *Environ Microbiol* 87:e02684-20. <https://doi.org/10.1128/AEM.02684-20>.
- 559 36. Pollock J, Muwonge A, Hutchings MR, Mainda G, Bronsvort BM, Gally DL,  
560 Corbishley A. 2020. Resistance to change: AMR gene dynamics on a commercial pig  
561 farm with high antimicrobial usage. *Sci Rep* 10:1708. [https://doi.org/10.1038/s41598-](https://doi.org/10.1038/s41598-020-58659-3)  
562 [020-58659-3](https://doi.org/10.1038/s41598-020-58659-3).
- 563 37. Holman DB, Chenier MR. 2013. Impact of subtherapeutic administration of tylosin and  
564 chlortetracycline on antimicrobial resistance in farrow-to-finish swine. *FEMS Microbiol*  
565 *Ecol* 85:1-13. <https://doi.org/10.1111/1574-6941.12093>.
- 566 38. Zhou Y, Fu H, Yang H, Wu J, Chen Z, Jiang H, Liu M, Liu Q, Huang L, Gao J, Chen C.  
567 2022. Extensive metagenomic analysis of the porcine gut resistome to identify indicators  
568 reflecting antimicrobial resistance. *Microbiome* 10:39. [https://doi.org/10.1186/s40168-](https://doi.org/10.1186/s40168-022-01241-y)  
569 [022-01241-y](https://doi.org/10.1186/s40168-022-01241-y).

- 570 39. Holman DB, Brunelle BW, Trachsel J, Allen HK. 2017. Meta-analysis To Define a Core  
571 Microbiota in the Swine Gut. *mSystems* 2:e00004-17.  
572 <https://doi.org/10.1128/mSystems.00004-17>.
- 573 40. Valeriano VD, Balolong MP, Kang DK. 2017. Probiotic roles of *Lactobacillus* sp. in  
574 swine: insights from gut microbiota. *J Appl Microbiol* 122:554-567.  
575 <https://doi.org/10.1111/jam.13364>.
- 576 41. Funk JA, Lejeune JT, Wittum TE, Rajala-Schultz PJ. 2006. The effect of subtherapeutic  
577 chlortetracycline on antimicrobial resistance in the fecal flora of swine. *Microb Drug*  
578 *Resist* 12:210-8. <https://doi.org/10.1089/mdr.2006.12.210>.
- 579 42. Poulin-Laprade D, Brouard JS, Gagnon N, Turcotte A, Langlois A, Matte JJ, Carrillo CD,  
580 Zaheer R, McAllister T, Topp E, Talbot G. 2021. Resistance determinants and their  
581 genetic context in enterobacteria from a longitudinal study of pigs reared under various  
582 husbandry conditions. *Appl Environ Microbiol* 87:e02612-20.  
583 <https://doi.org/10.1128/AEM.02612-20>.
- 584 43. Ghanbari M, Klose V, Crispie F, Cotter PD. 2019. The dynamics of the antibiotic  
585 resistome in the feces of freshly weaned pigs following therapeutic administration of  
586 oxytetracycline. *Sci Rep* 9:4062. <https://doi.org/10.1038/s41598-019-40496-8>.
- 587 44. Lekagul A, Tangcharoensathien V, Yeung S. 2019. Patterns of antibiotic use in global pig  
588 production: a systematic review. *Vet Anim Sci* 7:100058.  
589 <https://doi.org/10.1016/j.vas.2019.100058>.
- 590 45. Igwaran A, Okoh AI. 2019. Human campylobacteriosis: A public health concern of  
591 global importance. *Heliyon* 5:e02814. <https://doi.org/10.1016/j.heliyon.2019.e02814>.

- 592 46. Wang S, Ma M, Liang Z, Zhu X, Yao H, Wang L, Wu Z. 2021. Pathogenic investigations  
593 of *Streptococcus pasteurianus*, an underreported zoonotic pathogen, isolated from a  
594 diseased piglet with meningitis. *Transbound Emerg Dis* doi:10.1111/tbed.14413.  
595 <https://doi.org/10.1111/tbed.14413>.
- 596 47. Chow JW, Kak V, You I, Kao SJ, Petrin J, Clewell DB, Lerner SA, Miller GH, Shaw KJ.  
597 2001. Aminoglycoside resistance genes *aph(2'')-Ib* and *aac(6')-Im* detected together in  
598 strains of both *Escherichia coli* and *Enterococcus faecium*. *Antimicrob Agents*  
599 *Chemother* 45:2691-4. <https://doi.org/10.1128/AAC.45.10.2691-2694.2001>.
- 600 48. Speer BS, Bedzyk L, Salyers AA. 1991. Evidence that a novel tetracycline resistance  
601 gene found on two *Bacteroides* transposons encodes an NADP-requiring oxidoreductase.  
602 *J Bacteriol* 173:176-83. <https://doi.org/10.1128/jb.173.1.176-183.1991>.
- 603 49. Corver J, Bakker D, Brouwer MS, Harmanus C, Hensgens MP, Roberts AP, Lipman LJ,  
604 Kuijper EJ, van Leeuwen HC. 2012. Analysis of a *Clostridium difficile* PCR ribotype 078  
605 100 kilobase island reveals the presence of a novel transposon, Tn6164. *BMC Microbiol*  
606 12:130. <https://doi.org/10.1186/1471-2180-12-130>.
- 607 50. Abril C, Brodard I, Perreten V. 2010. Two novel antibiotic resistance genes, *tet(44)* and  
608 *ant(6)-Ib*, are located within a transferable pathogenicity island in *Campylobacter fetus*  
609 subsp. *fetus*. *Antimicrob Agents Chemother* 54:3052-3055.  
610 <https://doi.org/10.1128/AAC.00304-10>.
- 611 51. Aziz RK, Breitbart M, Edwards RA. 2010. Transposases are the most abundant, most  
612 ubiquitous genes in nature. *Nucleic Acids Res* 38:4207-4217.  
613 <https://doi.org/10.1093/nar/gkq140>.

- 614 52. Achard A, Villers C, Pichereau V, Leclercq R. 2005. New *lnu(C)* gene conferring  
615 resistance to lincomycin by nucleotidylation in *Streptococcus agalactiae* UCN36.  
616 Antimicrob Agents Chemother 49:2716-9. [https://doi.org/10.1128/AAC.49.7.2716-](https://doi.org/10.1128/AAC.49.7.2716-2719.2005)  
617 [2719.2005](https://doi.org/10.1128/AAC.49.7.2716-2719.2005).
- 618 53. Lyras D, Adams V, Ballard SA, Teng WL, Howarth PM, Crellin PK, Bannam TL,  
619 Songer JG, Rood JI. 2009. tIS Cpe8, an IS1595-family lincomycin resistance element  
620 located on a conjugative plasmid in *Clostridium perfringens*. J Bacteriol 191:6345-6351.  
621 <https://doi.org/10.1128/JB.00668-09>.
- 622 54. Le Roy T, Van der Smissen P, Paquot A, Delzenne N, Muccioli GG, Collet JF, Cani PD.  
623 2020. *Dysosmobacter welbionis* gen. nov., sp. nov., isolated from human faeces and  
624 emended description of the genus *Oscillibacter*. Int J Syst Evol Microbiol 70:4851-4858.  
625 <https://doi.org/10.1099/ijsem.0.003547>.
- 626 55. Le Roy T, de Hase EM, Van Hul M, Paquot A, Pelicaen R, Régnier M, Depommier C,  
627 Druart C, Everard A, Maiter D. 2022. *Dysosmobacter welbionis* is a newly isolated  
628 human commensal bacterium preventing diet-induced obesity and metabolic disorders in  
629 mice. Gut 71:534-543. <https://doi.org/10.1136/gutjnl-2020-323778>.
- 630 56. Bolger AM, Lohse M, Usadel B. 2014. Trimmomatic: a flexible trimmer for Illumina  
631 sequence data. Bioinformatics 30:2114-20.  
632 <https://doi.org/10.1093/bioinformatics/btu170>.
- 633 57. Warr A, Affara N, Aken B, Beiki H, Bickhart DM, Billis K, Chow W, Eory L, Finlayson  
634 HA, Flicek P, Giron CG, Griffin DK, Hall R, Hannum G, Hourlier T, Howe K, Hume  
635 DA, Izuogu O, Kim K, Koren S, Liu H, Manchanda N, Martin FJ, Nonneman DJ,  
636 O'Connor RE, Phillippy AM, Rohrer GA, Rosen BD, Rund LA, Sargent CA, Schook LB,

- 637 Schroeder SG, Schwartz AS, Skinner BM, Talbot R, Tseng E, Tuggle CK, Watson M,  
638 Smith TPL, Archibald AL. 2020. An improved pig reference genome sequence to enable  
639 pig genetics and genomics research. *Gigascience* 9:giaa051.  
640 <https://doi.org/10.1093/gigascience/giaa051>.
- 641 58. Langmead B, Salzberg SL. 2012. Fast gapped-read alignment with Bowtie 2. *Nat*  
642 *Methods* 9:357-9. <https://doi.org/10.1038/nmeth.1923>.
- 643 59. Li D, Liu C-M, Luo R, Sadakane K, Lam T-WJB. 2015. MEGAHIT: an ultra-fast single-  
644 node solution for large and complex metagenomics assembly via succinct de Bruijn  
645 graph. *31*:1674-1676.
- 646 60. Kang DD, Li F, Kirton E, Thomas A, Egan R, An H, Wang Z. 2019. MetaBAT 2: an  
647 adaptive binning algorithm for robust and efficient genome reconstruction from  
648 metagenome assemblies. *PeerJ* 7:e7359. <https://doi.org/10.7717/peerj.7359>.
- 649 61. Parks DH, Imelfort M, Skennerton CT, Hugenholtz P, Tyson GWJGr. 2015. CheckM:  
650 assessing the quality of microbial genomes recovered from isolates, single cells, and  
651 metagenomes. *25*:1043-1055.
- 652 62. Olm MR, Brown CT, Brooks B, Banfield JFJTij. 2017. dRep: a tool for fast and accurate  
653 genomic comparisons that enables improved genome recovery from metagenomes  
654 through de-replication. *11*:2864-2868.
- 655 63. Chaumeil P-A, Mussig AJ, Hugenholtz P, Parks DH. 2020. GTDB-Tk: a toolkit to  
656 classify genomes with the Genome Taxonomy Database. Oxford University Press.
- 657 64. Asnicar F, Thomas AM, Beghini F, Mengoni C, Manara S, Manghi P, Zhu Q, Bolzan M,  
658 Cumbo F, May UJNc. 2020. Precise phylogenetic analysis of microbial isolates and  
659 genomes from metagenomes using PhyloPhlAn 3.0. *11*:1-10.

- 660 65. Letunic I, Bork P. 2021. Interactive Tree Of Life (iTOL) v5: an online tool for  
661 phylogenetic tree display and annotation. *Nucleic Acids Res* 49:W293-W296.  
662 <https://doi.org/10.1093/nar/gkab301>.
- 663 66. Shaffer M, Borton MA, McGivern BB, Zayed AA, La Rosa SL, Solden LM, Liu P,  
664 Narro AB, Rodriguez-Ramos J, Bolduc B, Gazitua MC, Daly RA, Smith GJ, Vik DR,  
665 Pope PB, Sullivan MB, Roux S, Wrighton KC. 2020. DRAM for distilling microbial  
666 metabolism to automate the curation of microbiome function. *Nucleic Acids Res*  
667 48:8883-8900. <https://doi.org/10.1093/nar/gkaa621>.
- 668 67. Zhang H, Yohe T, Huang L, Entwistle S, Wu P, Yang Z, Busk PK, Xu Y, Yin Y. 2018.  
669 dbCAN2: a meta server for automated carbohydrate-active enzyme annotation. *Nucleic*  
670 *Acids Res* 46:W95-W101. <https://doi.org/10.1093/nar/gky418>.
- 671 68. Alcock BP, Raphenya AR, Lau TTY, Tsang KK, Bouchard M, Edalatmand A, Huynh W,  
672 Nguyen AV, Cheng AA, Liu S, Min SY, Miroshnichenko A, Tran HK, Werfalli RE,  
673 Nasir JA, Oloni M, Speicher DJ, Florescu A, Singh B, Faltyn M, Hernandez-  
674 Koutoucheva A, Sharma AN, Bordeleau E, Pawlowski AC, Zubyk HL, Dooley D,  
675 Griffiths E, Maguire F, Winsor GL, Beiko RG, Brinkman FSL, Hsiao WWL, Domselaar  
676 GV, McArthur AG. 2020. CARD 2020: antibiotic resistome surveillance with the  
677 comprehensive antibiotic resistance database. *Nucleic Acids Res* 48:D517-D525.  
678 <https://doi.org/10.1093/nar/gkz935>.
- 679 69. Seemann T. 2014. Prokka: rapid prokaryotic genome annotation. *Bioinformatics*  
680 30:2068-9. <https://doi.org/10.1093/bioinformatics/btu153>.
- 681 70. Mallick H, Rahnavard A, McIver LJ, Ma S, Zhang Y, Nguyen LH, Tickle TL, Weingart  
682 G, Ren B, Schwager EH, Chatterjee S, Thompson KN, Wilkinson JE, Subramanian A, Lu

683 Y, Waldron L, Paulson JN, Franzosa EA, Bravo HC, Huttenhower C. 2021. Multivariable  
684 association discovery in population-scale meta-omics studies. PLoS Comput Biol  
685 17:e1009442. <https://doi.org/10.1371/journal.pcbi.1009442>.

686

## 687 **Figure legends**

688 **Figure 1.** Maximum likelihood phylogenetic tree of 1,150 MAGs based on the alignment of 399  
689 marker genes in PhyloPhlAn. MAGs colored by GTBD-tk assigned phyla are labelled in the  
690 inner ring. The outer ring indicates the number of carbohydrate-active enzymes (CAZymes) per  
691 MAG and the outer bars display the percent relative abundance (minimum = 0%; maximum =  
692 2.73%) of each MAG in the pre- and post-weaning fecal samples.

693 **Figure 2.** Metagenome-assembled genomes (MAGs) that were identified in 85% or more of all  
694 samples from this study and publicly available metagenome samples. The relative abundance  
695 within all of the MAGs within these samples (n = 805) is displayed as a heat map and the  
696 presence of genes encoding for pathways involved in selected short-chain fatty acid and other  
697 organic acid production, as well as polysaccharide degradation (carbohydrate-active enzymes  
698 [CAZymes]) is indicated by a dot. The total number of MAGs (n = 1,150) that encode these  
699 pathways are displayed on the top of the plot.

700

701

702





Tree scale: 1

CAZyme count

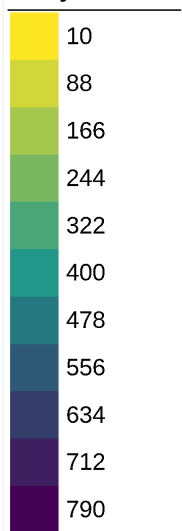

Relative abundance

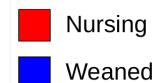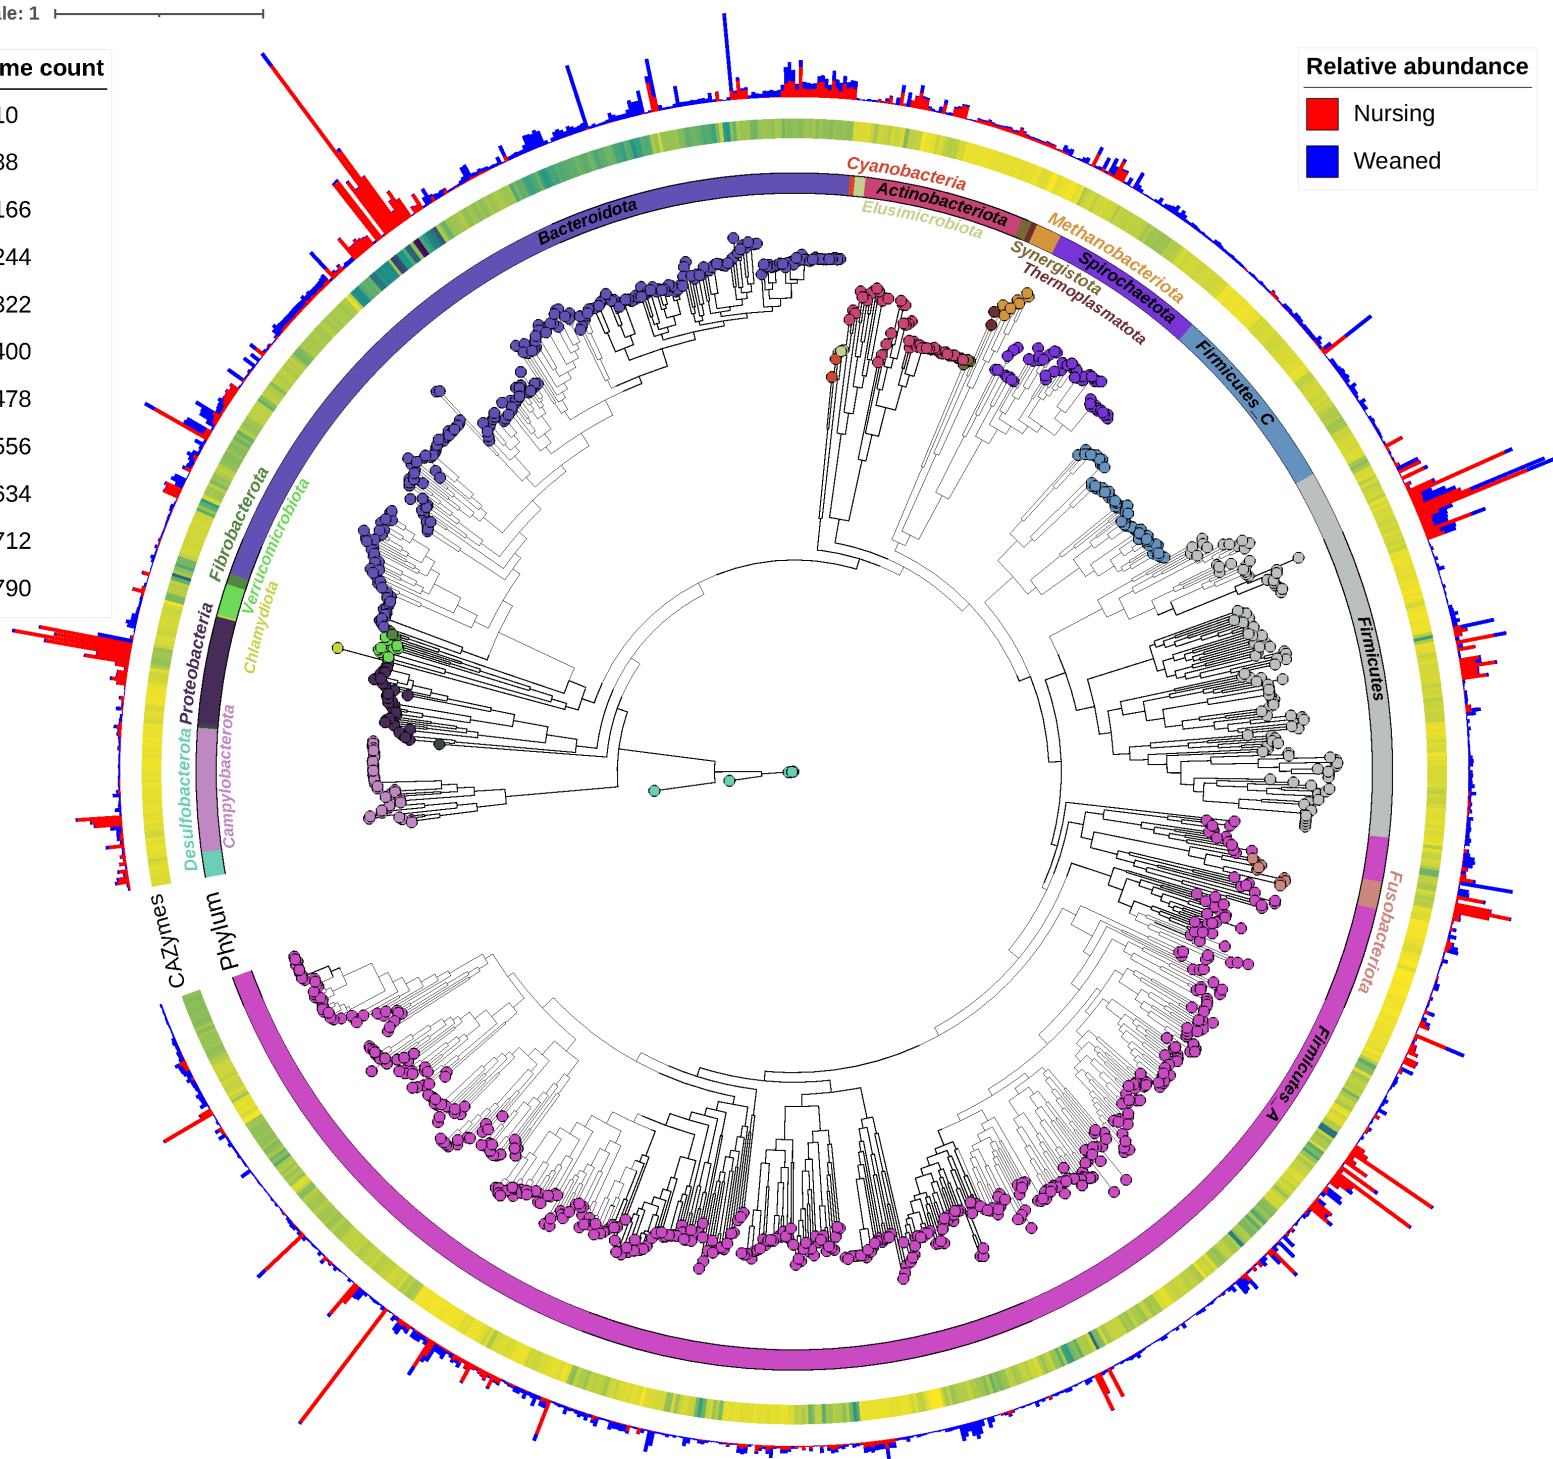

Source: https://www.biorxiv.org/content/10.1101/2022.05.19.492759v1.full.pdf
